# Supplementary material for: Modified structure of two-dimensional polythiophene derivatives by incorporating electron-deficient units into terthiophene-vinylene conjugated side chains and the polymer backbone: synthesis, optoelectronic and self-assembly properties, and photovoltaic application
Source: Royal Society of Chemistry journal article supplement (doi:10.1039/c6ra11738d), 2016-01-01
Supplement: c6ra11738d1.pdf [file c6ra11738d1.pdf]

# Modified Structure of Two-Dimensional Polythiophene Derivatives by Incorporating Electron-Deficient Units into Terthiophene-Vinylene Conjugated Side Chains and Polymer Backbone: Synthesis, Optoelectronic and Self- Assembly Properties, and Photovoltaic Application

Chuen-Yo Hsiow,<sup>\*ab</sup> Yu-Hsiang Lin,<sup>c</sup> Rathinam Raja,<sup>a</sup> Syang-Peng Rwei,<sup>c</sup> Wen-Yen Chiu,<sup>d</sup> Chi-An Dai,<sup>d</sup> Leeyih

Wang<sup>\*a</sup>

<sup>a</sup>Center for Condensed Matter Sciences, National Taiwan University, 10617 Taipei, Taiwan

<sup>b</sup>Joint Center for Artificial Photosynthesis, California Institute of Technology, 91125 Pasadena, USA

<sup>c</sup>Institute of Organic and Polymeric Materials, National Taipei University of Technology, 10608 Taipei, Taiwan

<sup>d</sup>Department of Chemical Engineering, National Taiwan University, 10617 Taipei, Taiwan

\*Corresponding Author: E-mail: chuenyo@caltech.edu (C-Y.H.); leewang@ntu.edu.tw (L.W.)

## Contents for Supporting Information:

- ⊙ <sup>1</sup>H-NMR and <sup>13</sup>C-NMR spectra of M2
- ⊙ Conditions and results (GPC) for microwave-assisted Stille polymerization of **P1**.
- ⊙ PESA spectrum of polymer films
- ⊙ Two-dimensional grazing incidence X-ray diffraction (GIXRD) of pristine polymer thin film.
- ⊙ Dark *J-V* curves of polymer/PC<sub>61</sub>BM devices.
- ⊙ Mobility of polymer with/without PC<sub>61</sub>BM
- ⊙ TGA and DSC plots

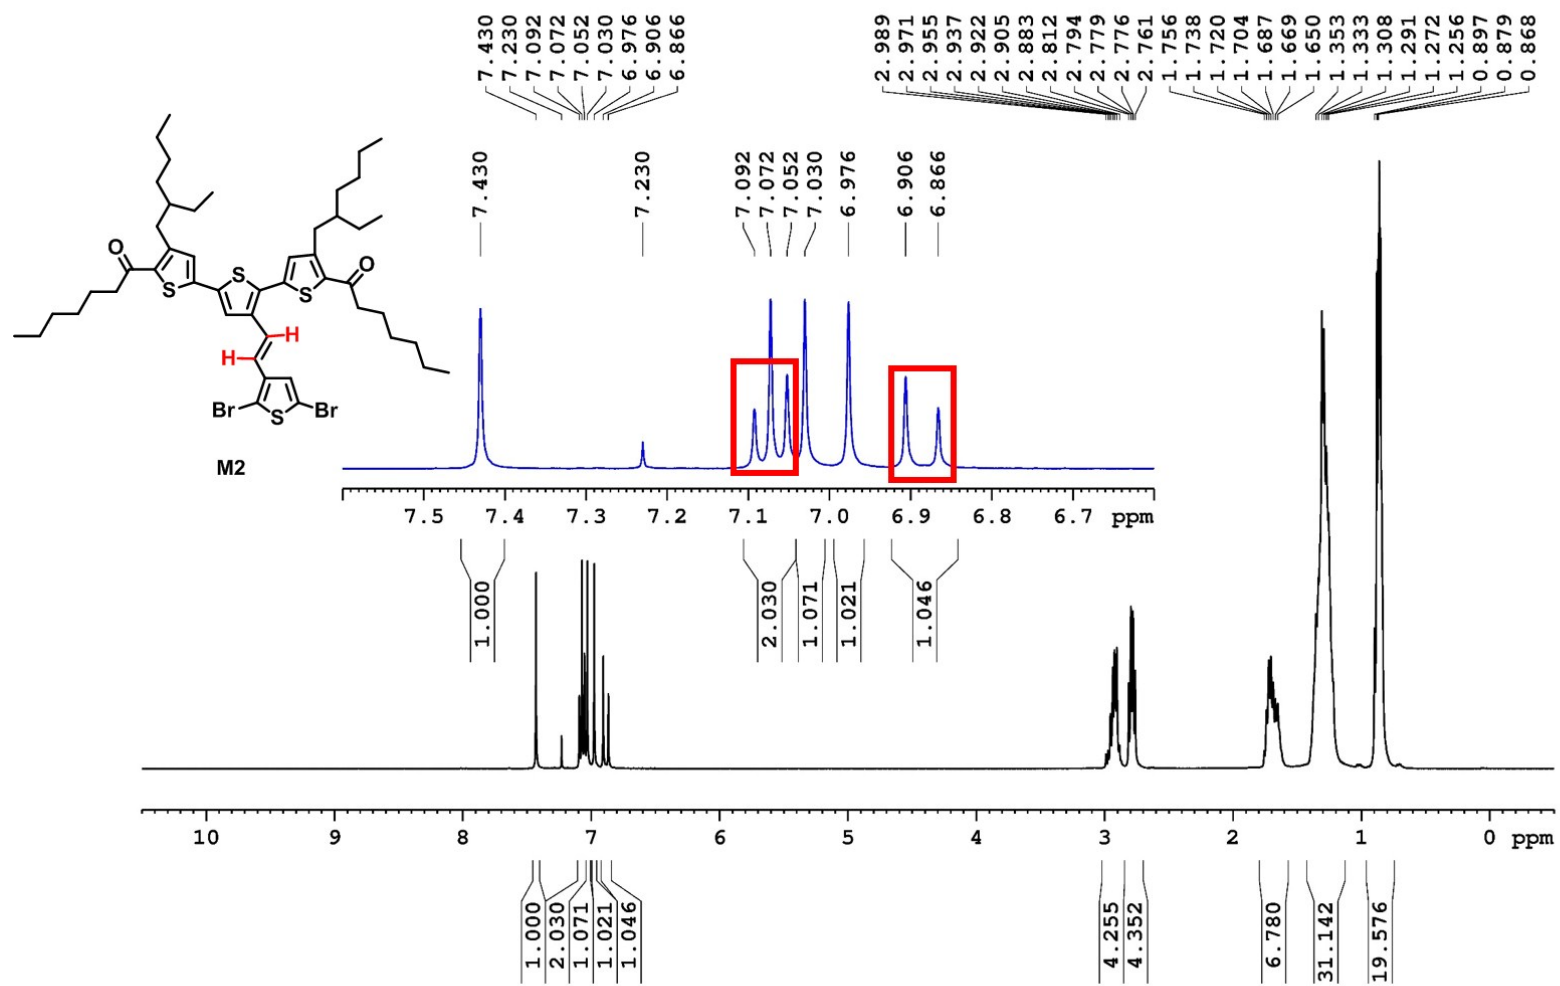

Figure S1.  $^1\text{H}$ -NMR spectrum of compound M2

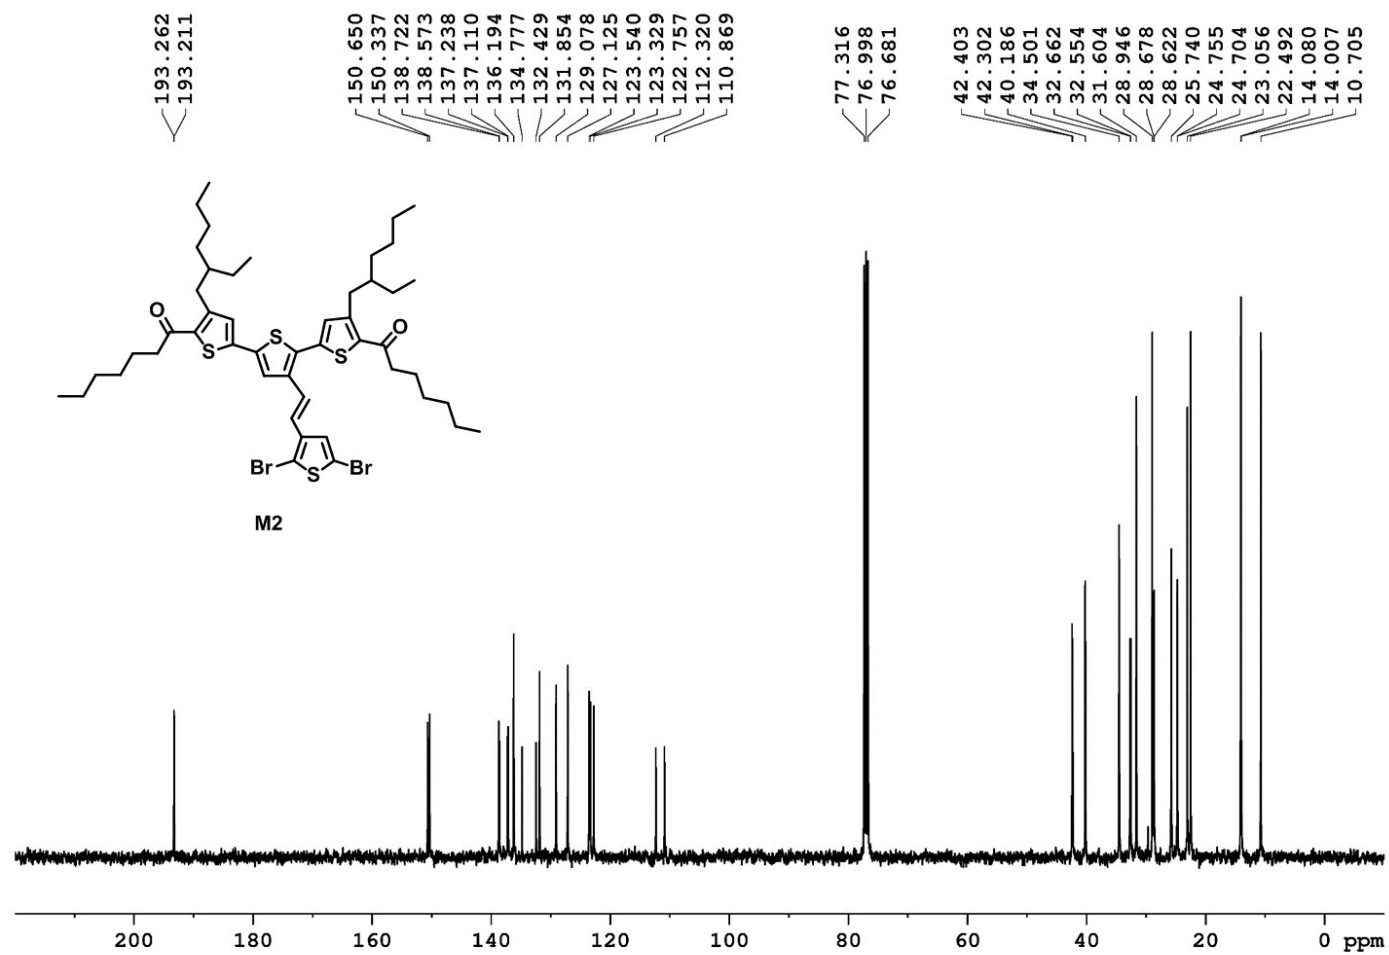

**Figure S2.** <sup>13</sup>C-NMR spectrum of compound M2

**Table S1.** Conditions and results (GPC) for microwave-assisted Stille polymerization of **P1**.

| Entry           | Solvent                | Concentration (M) | Catalyst <sup>a</sup> | Condition <sup>b</sup> | M <sub>n</sub> (kDa) <sup>c</sup> | PDI         |
|-----------------|------------------------|-------------------|-----------------------|------------------------|-----------------------------------|-------------|
| 1               | Toluene                | 0.01              | A, 5 mol%             | 1                      | 5.2 <sup>e</sup>                  | 1.85        |
| 2               | Toluene                | 0.01              | A, 5 mol%             | 2                      | 9.5                               | 2.32        |
| 3               | Toluene                | 0.05              | A, 5 mol%             | 1                      | 11.0                              | 2.61        |
| 4               | Toluene                | 0.05              | A, 3 mol%             | 1                      | 12.0                              | 2.58        |
| 5               | Toluene                | 0.05              | A, 1 mol%             | 1                      | 13.2                              | 2.59        |
| 6               | Toluene                | 0.05              | B, 5 mol%             | 1                      | 10.0                              | 4.33        |
| 7               | <i>p</i> -xylene       | 0.05              | A, 3 mol%             | 2                      | 14.0                              | 2.36        |
| <b>8</b>        | <b><i>p</i>-xylene</b> | <b>0.05</b>       | <b>B, 3 mol%</b>      | <b>2</b>               | <b>14.0</b>                       | <b>4.61</b> |
| 9               | <i>p</i> -xylene       | 0.05              | A, 3 mol%             | 3                      | 12.1                              | 2.60        |
| 10 <sup>d</sup> | Toluene                | 0.01              | A, 5 mol%             | 4                      | 12.0                              | 3.61        |

<sup>a</sup>A : Pd(PPh<sub>3</sub>)<sub>4</sub>; B : Pd<sub>2</sub>dba<sub>3</sub>, P(*o*-tol)<sub>3</sub>; <sup>b</sup>**Condition (1)** raise temperature from r.t. to 200 °C as fast as possible; hold the temperature 30 min; cool down to 55 °C. **Condition (2)** raise temperature from r.t. to 200 °C as fast as possible; hold the temperature 60 min; cool down to 55 °C. **Condition (3)** raise temperature from r.t. to 250 °C as fast as possible; hold the temperature 30 min; cool down to 55 °C. **Condition (4)** reflux 2 days. <sup>c</sup>Soxhlet extractions by using methanol and hexane quickly to remove the small molecules and oligomers and finally chloroform to obtain the target compounds for optimizing polymerization conditions. M<sub>n</sub> and PDI of the polymers were estimated by GPC using polystyrene as standards in THF. <sup>d</sup>conventional heating. <sup>e</sup>Soxhlet extractions by only using methanol to remove impurity and chloroform to obtain the target polymer.

© PESA spectrum of polymer films

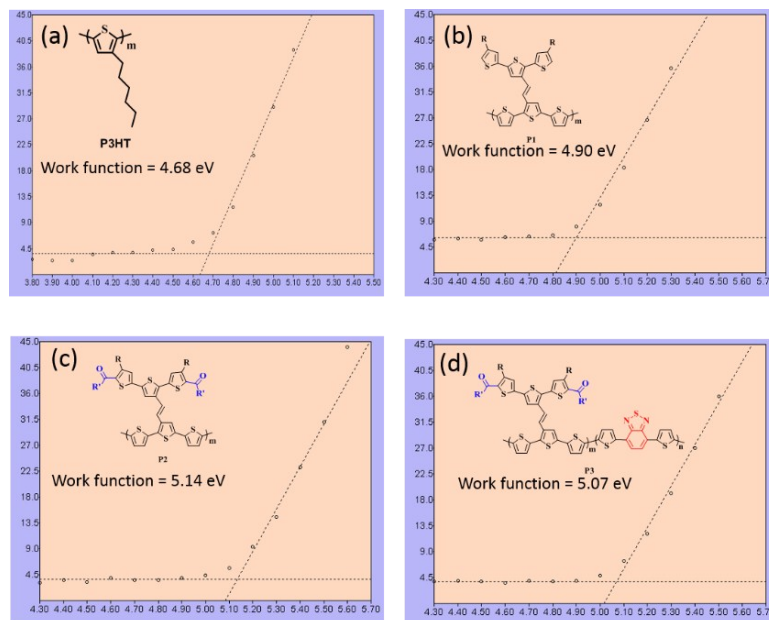**Figure S3.** PESA spectrum of (a) **P3HT**; (b) **P1**; (c) **P2**; (d) **P3** film prepared by spin-coating followed by thermal annealing at 120°C for 15 min and measured under identical condition.

© Two-dimensional grazing incidence X-ray diffraction (GIXRD) of pristine polymer thin film.

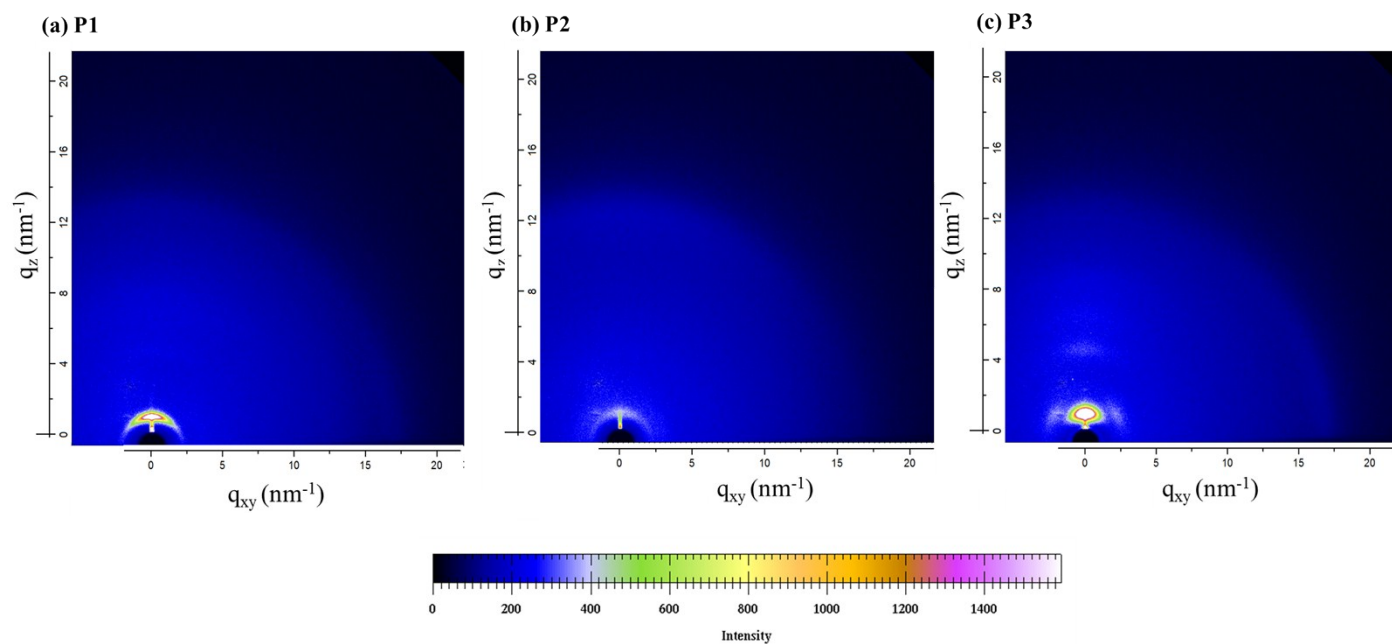

**Figure S4.** Two-dimensional grazing incidence X-ray diffraction (GIXRD) from thin films of (a) **P1**; (b) **P2**; (c) **P3** prepared by drop-cast followed by thermal annealing at 120°C for 15 min and measured under identical condition.

© Dark  $J$ - $V$  curves of polymer/ $\text{PC}_{61}\text{BM}$  devices.

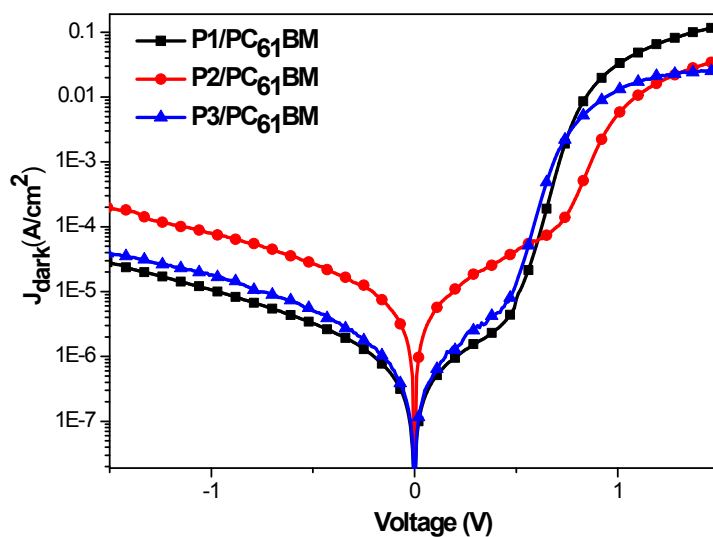

**Figure S5.** Dark  $J$ - $V$  curves of polymer/ $\text{PC}_{61}\text{BM}$  devices.

© Mobility of polymer with/without PC<sub>61</sub>BM.

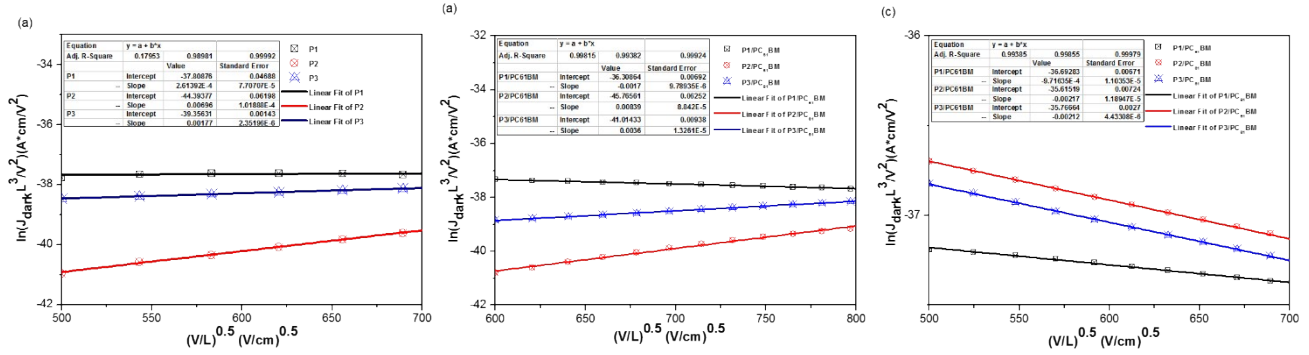

**Figure S6.**  $\ln(J_{\text{dark}} L^3 V^{-2})$  versus  $(VL^{-1})^{0.5}$  plots of (a) the pristine polymers for the measurement of hole mobility; the polymers blend PC<sub>61</sub>BM for the measurement of (b) hole and (c) electron mobility by the SCLC method.

**Table S2.** Mobility of P1, P2 and P3 with/without PC<sub>61</sub>BM by the SCLC method.

|           | Pristine polymer<br>hole mobility<br>(cm <sup>2</sup> /(V*sec)) | Blend with PC <sub>61</sub> BM<br>hole mobility<br>(cm <sup>2</sup> /(V*sec)) | Blend with PC <sub>61</sub> BM<br>electron mobility<br>(cm <sup>2</sup> /(V*sec)) | h <sup>+</sup> /e <sup>-</sup> |
|-----------|-----------------------------------------------------------------|-------------------------------------------------------------------------------|-----------------------------------------------------------------------------------|--------------------------------|
| <b>P1</b> | 3.9×10 <sup>-4</sup>                                            | 2.1*10 <sup>-4</sup>                                                          | 2.5*10 <sup>-4</sup>                                                              | 0.84                           |
| <b>P2</b> | 3.8×10 <sup>-5</sup>                                            | 1.1x10 <sup>-6</sup>                                                          | 3.5x10 <sup>-4</sup>                                                              | 0.003                          |
| <b>P3</b> | 1.0×10 <sup>-4</sup>                                            | 8.4x10 <sup>-5</sup>                                                          | 3.3x10 <sup>-4</sup>                                                              | 0.25                           |

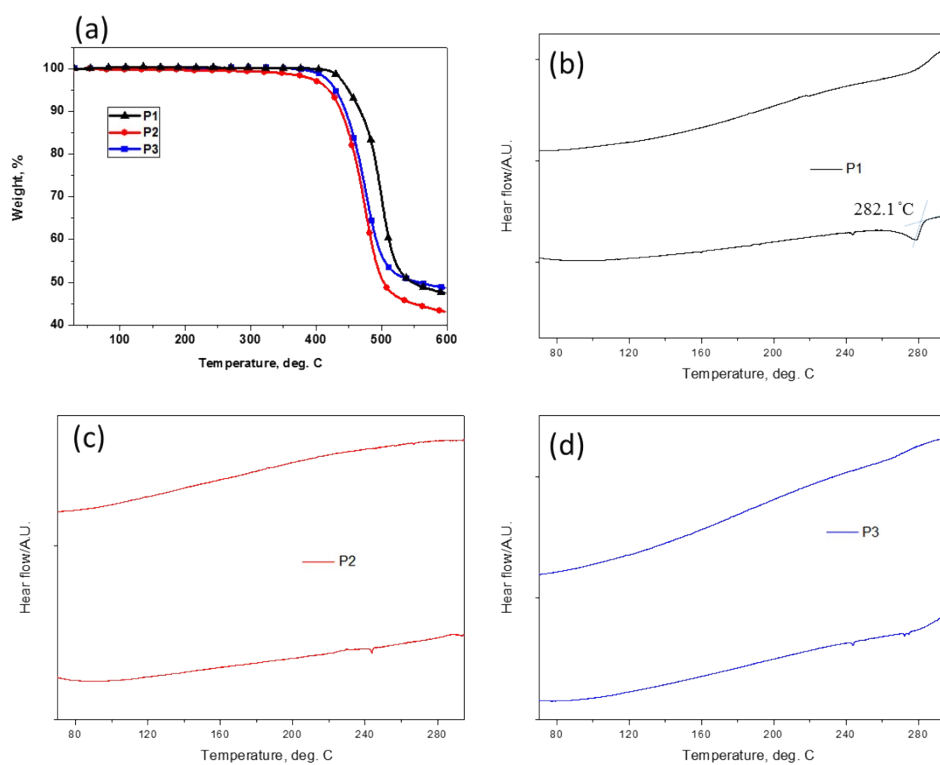

**Figure S7.** (a) TGA and (b-d) DSC second heating profiles of **P1**, **P2**, and **P3** with a heating rate of 10 °C/min under N<sub>2</sub> atmosphere and a cooling rate of 10 °C/min.
